# Supplementary material for: Profiling of N6-Methyladenosine (m6A) Modification Landscape in Response to Drought Stress in Apple (Malus prunifolia (Willd.) Borkh)
Source: MDPI journal article supplement (doi:10.3390/plants11010103), 2021-12-30
Supplement: s1 [file s1]

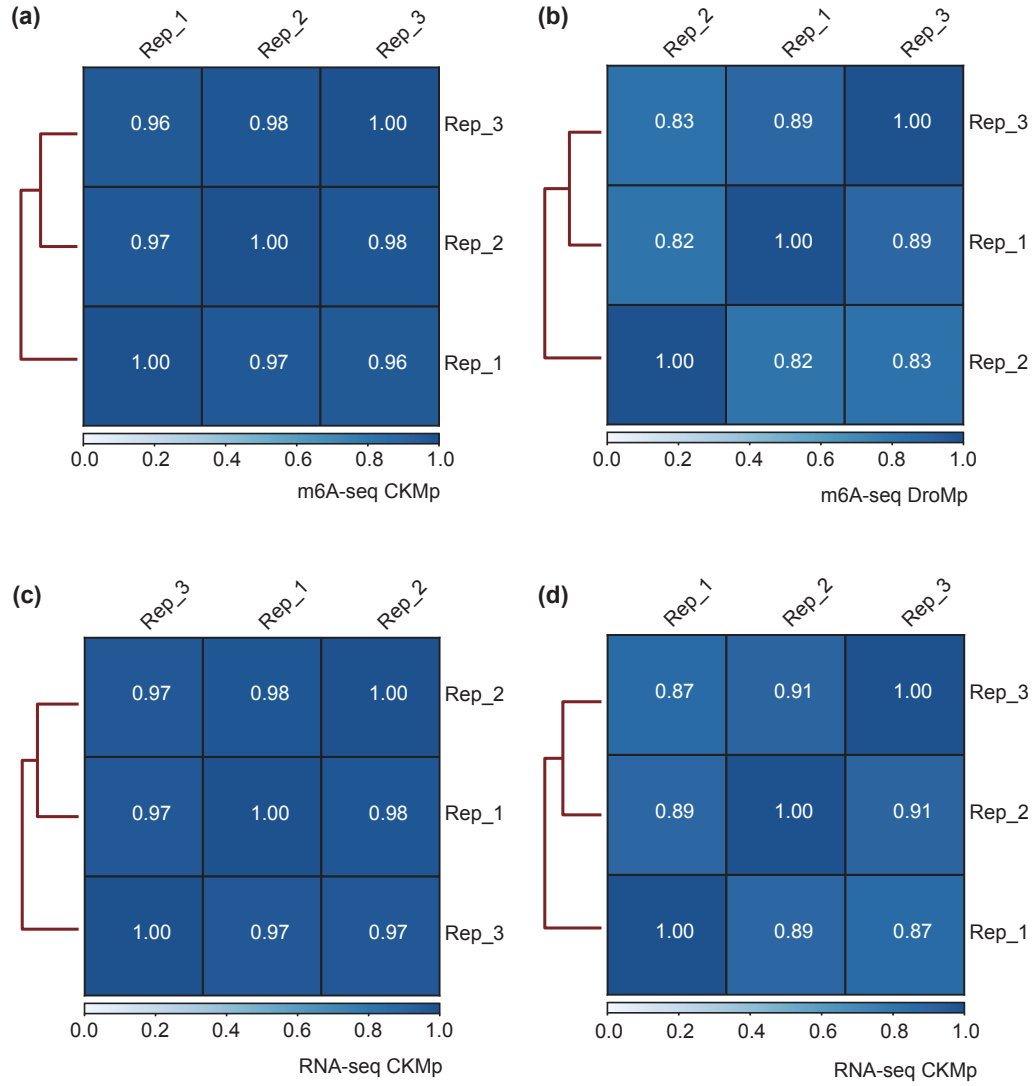

**Supplementary Figure S1.** The Pearson correlation analysis of m<sup>6</sup>A-seq and RNA-seq data. **(a)** m<sup>6</sup>A data of three biological replicates in *M. prunifolia* under control condition. **(b)** m<sup>6</sup>A data of three biological replicates in *M. prunifolia* under drought condition. **(c)** RNA-seq data in *M. prunifolia* under ccontrol condition. **(d)** RNA-seq data in *M. prunifolia* under drought condition. CKMp, *M. prunifolia* seedlings under control condition; DroMp, *M. prunifolia* under drought condition.
